# Supplementary material
Source: HighWire-hosted journal article supplement (https://bmjopen.bmj.com/content/7/6/e014486)
Supplement: inline-supplementary-material-1 [file inline-supplementary-material-1.pdf]

**Supplement 1. Results of sensitivity analysis.**

| Variables                                                  | Stroke      |             |         |
|------------------------------------------------------------|-------------|-------------|---------|
|                                                            | Adjusted RR | 95% CI      | P-value |
| <b>Medication adherence (Medical Possession Rate; MPR)</b> |             |             |         |
| High adherence ( $0.8 \leq \text{MPR} \leq 1.5$ )          | 1.00        | -           |         |
| Intermediate adherence ( $0.5 \leq \text{MPR} < 0.8$ )     | 1.15        | 1.07 - 1.23 | 0.0001  |
| Poor adherence ( $\text{MPR} < 0.5$ )                      | 1.28        | 1.18 - 1.40 | <.0001  |
| <b>Medication adherence (Medical Possession Rate; MPR)</b> |             |             |         |
| High adherence ( $0.8 \leq \text{MPR} \leq 2.0$ )          | 1.00        | -           |         |
| Intermediate adherence ( $0.5 \leq \text{MPR} < 0.8$ )     | 1.14        | 1.06 - 1.22 | 0.0003  |
| Poor adherence ( $\text{MPR} < 0.5$ )                      | 1.28        | 1.18 - 1.39 | <.0001  |
| <b>Medication adherence (Medical Possession Rate; MPR)</b> |             |             |         |
| H                                                          | 1.00        | -           |         |
| Intermediate adherence ( $0.4 \leq \text{MPR} < 0.7$ )     | 1.19        | 1.10 - 1.28 | <.0001  |
| Poor adherence ( $\text{MPR} < 0.4$ )                      | 1.29        | 1.17 - 1.41 | <.0001  |
| <b>Medication adherence (Medical Possession Rate; MPR)</b> |             |             |         |
| H                                                          | 1.00        | -           |         |
| Intermediate adherence ( $0.6 \leq \text{MPR} < 0.9$ )     | 1.10        | 1.04 - 1.16 | 0.0008  |
| Poor adherence ( $\text{MPR} < 0.6$ )                      | 1.28        | 1.19 - 1.39 | <.0001  |

\* Adjusted for age, sex, income, region, charlson comorbidity index, metabolic syndrome, family history of stroke, number of antihypertensive medication, duration of hypertension, and year
